# Supplementary material for: ETAQA Solutions for Infinite Markov Processes with Repetitive Structure
Source: Atypon-hosted journal article supplement (doi:10.1287/ijoc.1050.0160), 2007-05-01
Supplement: ijoc.1050.0160-sm-riska_and_smirni.pdf [file ijoc.1050.0160-sm-riska_and_smirni.pdf]

# Online Supplement to “ETAQA Solutions for Infinite Markov Processes with Repetitive Structure”

Alma Riska

Seagate Research, 1251 Waterfront Place, Pittsburgh, PA 15222, USA, {alma.riska@seagate.com}

Evgenia Smirni

Department of Computer Science, College of William and Mary, Williamsburg, VA 23187-8795, USA, {esmirni@cs.wm.edu}

*INFORMS Journal on Computing*

## Explicit computation of the matrix $\mathbf{R}$

QBD processes are defined as the intersection of M/G/1 and GI/M/1-type processes. Hence, both matrix  $\mathbf{G}$  (characteristic for M/G/1) and matrix  $\mathbf{R}$  (characteristic for GI/M/1) can be defined for a QBD process as solutions of the following quadratic equations (see Latouche and Ramaswami (1999)):

$$\mathbf{B} + \mathbf{L}\mathbf{G} + \mathbf{F}\mathbf{G}^2 = \mathbf{0}, \quad \mathbf{F} + \mathbf{R}\mathbf{L} + \mathbf{R}^2\mathbf{B} = \mathbf{0}.$$

If matrix-geometric is used to solve a QBD process then the relation between  $\boldsymbol{\pi}^{(i)}$  and  $\boldsymbol{\pi}^{(i-1)}$  for  $i > 1$  is expressed in terms of  $\mathbf{R}$

$$\boldsymbol{\pi}^{(i)} = \boldsymbol{\pi}^{(i-1)}\mathbf{R},$$

If matrix-analytic is the solution method then the relation between  $\boldsymbol{\pi}^{(i)}$  and  $\boldsymbol{\pi}^{(i-1)}$  is based on Ramaswami’s recursive formula:

$$\boldsymbol{\pi}^{(i)} = -\boldsymbol{\pi}^{(i-1)}\mathbf{S}^{(1)}(\mathbf{S}^{(0)})^{-1},$$

where  $\mathbf{S}^{(1)} = \mathbf{F}$  and  $\mathbf{S}^{(0)} = (\mathbf{L} + \mathbf{F}\mathbf{G})$ , i.e., the only auxiliary sums used in the solution of M/G/1 processes that are defined for a QBD process. The above equations allow the derivation of the fundamental relation between  $\mathbf{R}$  and  $\mathbf{G}$  as presented in Latouche and Ramaswami (1999, pages 137-8),

$$\mathbf{R} = -\mathbf{F}(\mathbf{L} + \mathbf{F}\mathbf{G})^{-1}. \tag{1}$$

Obviously, for the case of QBD processes, knowing  $\mathbf{G}$  (or  $\mathbf{R}$ ) implies a direct computation of  $\mathbf{R}$  (or  $\mathbf{G}$ ). Computing  $\mathbf{G}$  is usually easier than computing  $\mathbf{R}$ :  $\mathbf{G}$ ’s computation is a

prerequisite to the computation of  $\mathbf{R}$  in the logarithmic reduction algorithm, the most efficient algorithm to compute  $\mathbf{R}$  proposed by Latouche and Ramaswami (1999). If  $\mathbf{B}$  can be expressed as a product of two vectors

$$\mathbf{B} = \boldsymbol{\alpha} \cdot \boldsymbol{\beta},$$

where, without loss of generality  $\boldsymbol{\beta}$  is assumed to be a normalized vector, then  $\mathbf{G}$  and  $\mathbf{R}$  can be explicitly obtained as

$$\mathbf{G} = \mathbf{1} \cdot \boldsymbol{\beta}, \quad \mathbf{R} = -\mathbf{F}(\mathbf{L} + \mathbf{F}\mathbf{1} \cdot \boldsymbol{\beta})^{-1}.$$

Representative examples, where the above condition holds, are the queues  $M/Cox/1$ ,  $M/Hr/1$ , and  $M/Er/1$ , whose service process is Coxian, Hyperexponential, and Erlang distribution respectively.

## References

Latouche, G., V. Ramaswami. 1999. *Introduction to Matrix Analytic Methods in Stochastic Modeling*. SIAM, Philadelphia PA. ASA-SIAM Series on Statistics and Applied Probability.
